# Supplementary material for: Facile synthesis of poly(vinyl acetate)-b-polystyrene copolymers mediated by an iniferter agent using a single methodology
Source: Royal Society of Chemistry journal article supplement (doi:10.1039/c7py01222e), 2017-01-01
Supplement: c7py01222e1.pdf [file c7py01222e1.pdf]

## Supporting Information

### **Facile Synthesis of Poly(vinyl acetate)-*b*-Polystyrene Copolymers Mediated by Iniferter Agent Using a Single Methodology**

Mengqi Wang,<sup>a</sup> Xiaowu Jiang,<sup>\*a,b</sup> Yanjing Luo,<sup>a</sup> Lifen Zhang,<sup>\*a</sup> Zhenping Cheng,<sup>\*a</sup> and Xiulin Zhu<sup>a</sup>

<sup>a</sup> Suzhou Key Laboratory of Macromolecular Design and Precision Synthesis, Jiangsu Key Laboratory of Advanced Functional Polymer Design and Application, State and Local Joint Engineering Laboratory for Novel Functional Polymeric Materials, Department of Polymer Science and Engineering, College of Chemistry, Chemical Engineering and Materials Science, Soochow University, Suzhou 215123, China.

<sup>b</sup> Faculty of Chemical Engineering, Huaiyin Institute of Technology, Huaian 223003, China. Correspondence and requests for materials should be addressed to Z. P. Cheng ([chengzhenping@suda.edu.cn](mailto:chengzhenping@suda.edu.cn)), L. F. Zhang ([zhanglifan@suda.edu.cn](mailto:zhanglifan@suda.edu.cn)) or X. W. Jiang ([jiangxiaowu@hyit.edu.cn](mailto:jiangxiaowu@hyit.edu.cn)).
